# Supplementary material
Source: HighWire-hosted journal article supplement (https://www.cmajopen.ca/highwire/filestream/84942/field_highwire_adjunct_files/3/CMAJOpen-2019-0213-2-at.pdf)

## GEMINI Cohort Study Data Collection Schematic

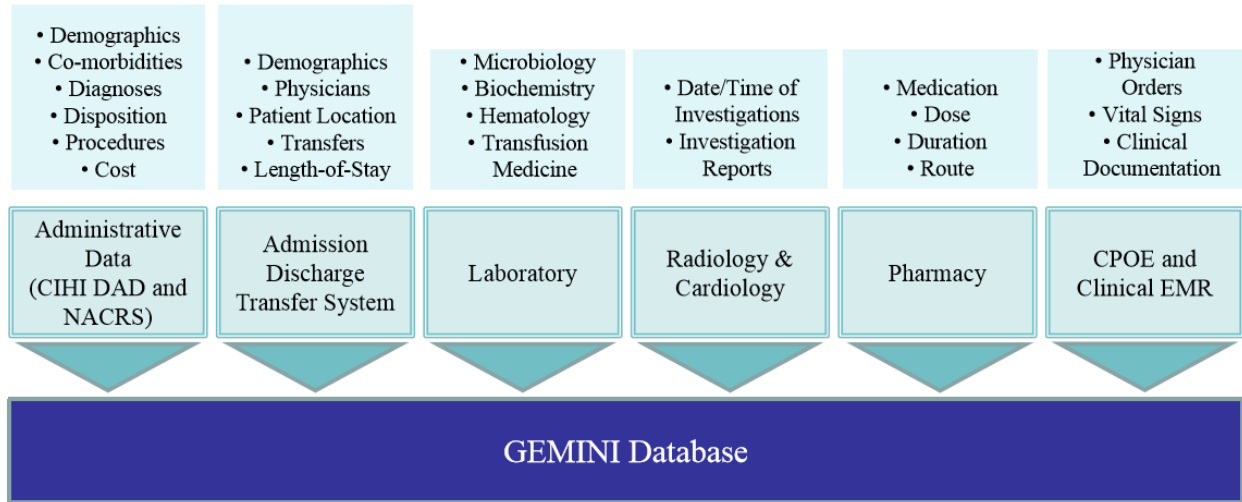

Supplement: CMAJOpen-2019-0213-2-at.pdf [file CMAJOpen-2019-0213-2-at.pdf]
